# Supplementary material
Source: PubMed Central journal article supplement (PMC3272372)

### **Quantitative analysis of BMF mRNA levels**

Total RNA was extracted using TRIZOL (Invitrogen). cDNA synthesis was performed using Omniscript™ from Qiagen and quantitative real-time PCR for *BMF* expression was performed using a Taqman kit from Applied Biosystems (hs.00372938\_m1 human Bmf).

### **Bisulfite modification and BMF DNA methylation analysis**

Bisulfite modification was performed using the EZ DNA Methylation-Gold Kit (Zymo Research). MethyLight PCR analysis was done as described previously with COL2A1 as reference gene.<sup>28</sup> Primers and probes for BMF were determined with the assistance of the computer program Primer Express version 2.0.0 (Applied Biosystems) to produce a 90-base-pair PCR amplicon in the promoter region of BMF transcription variant 1 with a mean distance of 146 base pairs to the transcription start site (Table S1). The primer specificity was verified on SssI treated (100% hypermethylated) and on whole genome amplified DNA (100% hypomethylated) bisulfite-modified DNA and on unmodified genomic DNA. The preparation of the hyper and hypomethylated control DNA was described recently.<sup>29</sup> Primers for bisulfite sequencing were designed using the Methyl Primer Express software version 1.0 (Applied Biosystems). PCR was performed in a 25 µl final volume under standard conditions with an annealing temperature of 54°C. Each reaction included 100 ng of bisulfite modified DNA, 250 nM of each primer, 200 µM of each dNTP, 1× PCR-Buffer and 1 U Hotstart Taq polymerase (Qiagen). PCR products were subcloned into pGEM-T easy (Promega) and inserts were sequenced using standard techniques at Microsynth (Switzerland).

**Table S1. Primers and probe for MethyLight PCR and bisulfite sequencing**

| Reaction                           | Primer  | Sequence                                            | Nucleotide positions as defined by<br>NCBI Reference Sequence<br>NT_010194.16/Hs15_10351 |
|------------------------------------|---------|-----------------------------------------------------|------------------------------------------------------------------------------------------|
| MethyLight PCR                     | Forward | 5'- CGAACTAAACCGCTACCAAAAAC -3'                     | 11.191.823 – 11.191.733                                                                  |
|                                    | Reverse | 5'- GGCGACGGTCGGAATTT-3'                            |                                                                                          |
|                                    | Probe   | 5'FAM- CGAACCTTCCCATAAA<br>AACATTACAAAAACCGA-3'BHQ1 |                                                                                          |
| Bisulfate sequencing<br>reaction 1 | Forward | 5'- GAAGAGGATTTAAGGGTTTTTTT-3'                      | 11.192.198 – 11.191.774                                                                  |
|                                    | Reverse | 5'- CCTTCCCATAAAAACATTACAA-3'                       |                                                                                          |
| Bisulfate sequencing<br>reaction 2 | Forward | 5'- TGTAATGTTTTTATGGGAAGGT-3'                       | 11.191.795 – 11.191.347                                                                  |
|                                    | Reverse | 5'-ACCCA ACTATAAATTCTACACCC-3'                      |                                                                                          |

**Figure S1. Growth of Bmf- or Bad-deficient tumors in wt recipients**

Primary lymphoma cells ( $10^5$ /recipient mouse) from ill *E $\mu$ -myc/bad<sup>-/-</sup>* (A) or *E $\mu$ -myc/bmf<sup>-/-</sup>* (B) mice were injected i.v. into three each of *wt* and *bad<sup>-/-</sup>* or *wt* and *bmf<sup>-/-</sup>* recipient mice respectively. Recipient mice were monitored for disease onset and the results from two individual lymphomas are presented in Kaplan-Meyer plots.

**Figure S2. Induction of Bmf mRNA by 5-aza-2-deoxycytidine in Daudi and Raji cells**

Raji and Daudi cells were incubated for the indicated times with 5 $\mu$ M of 5'-Aza-deoxycytidine. RNA was isolated and reverse transcribed prior qPCR-based quantification of BMF and the TATA-binding protein (TBP) mRNA. Bars depict the ratio of BMF/TBP transcript levels and represent means of triplicates. One experiment out of two yielding similar results is shown.

**Figure S3. Induction of Bmf and of apoptosis by SAHA and serum deprivation in Raji and Dadi cells cells**

(A) Western blot analysis of Bmf levels in Raji and Daudi cell lines treatment with 2 $\mu$ M SAHA or after serum deprivation for the indicated times. (B) Cell death determined by AnnexinV/7-AAD staining in Daudi and Raji cells treatment with 2 or 4 $\mu$ M SAHA for the indicated times. Values represent mean $\pm$ SE of 2 independent experiments. (C) Cell death determined by AnnexinV/7-AAD staining in Daudi and Raji cells after serum deprivation for the indicated times. Values represent mean $\pm$ SE of 2 independent experiments.

Figure S1

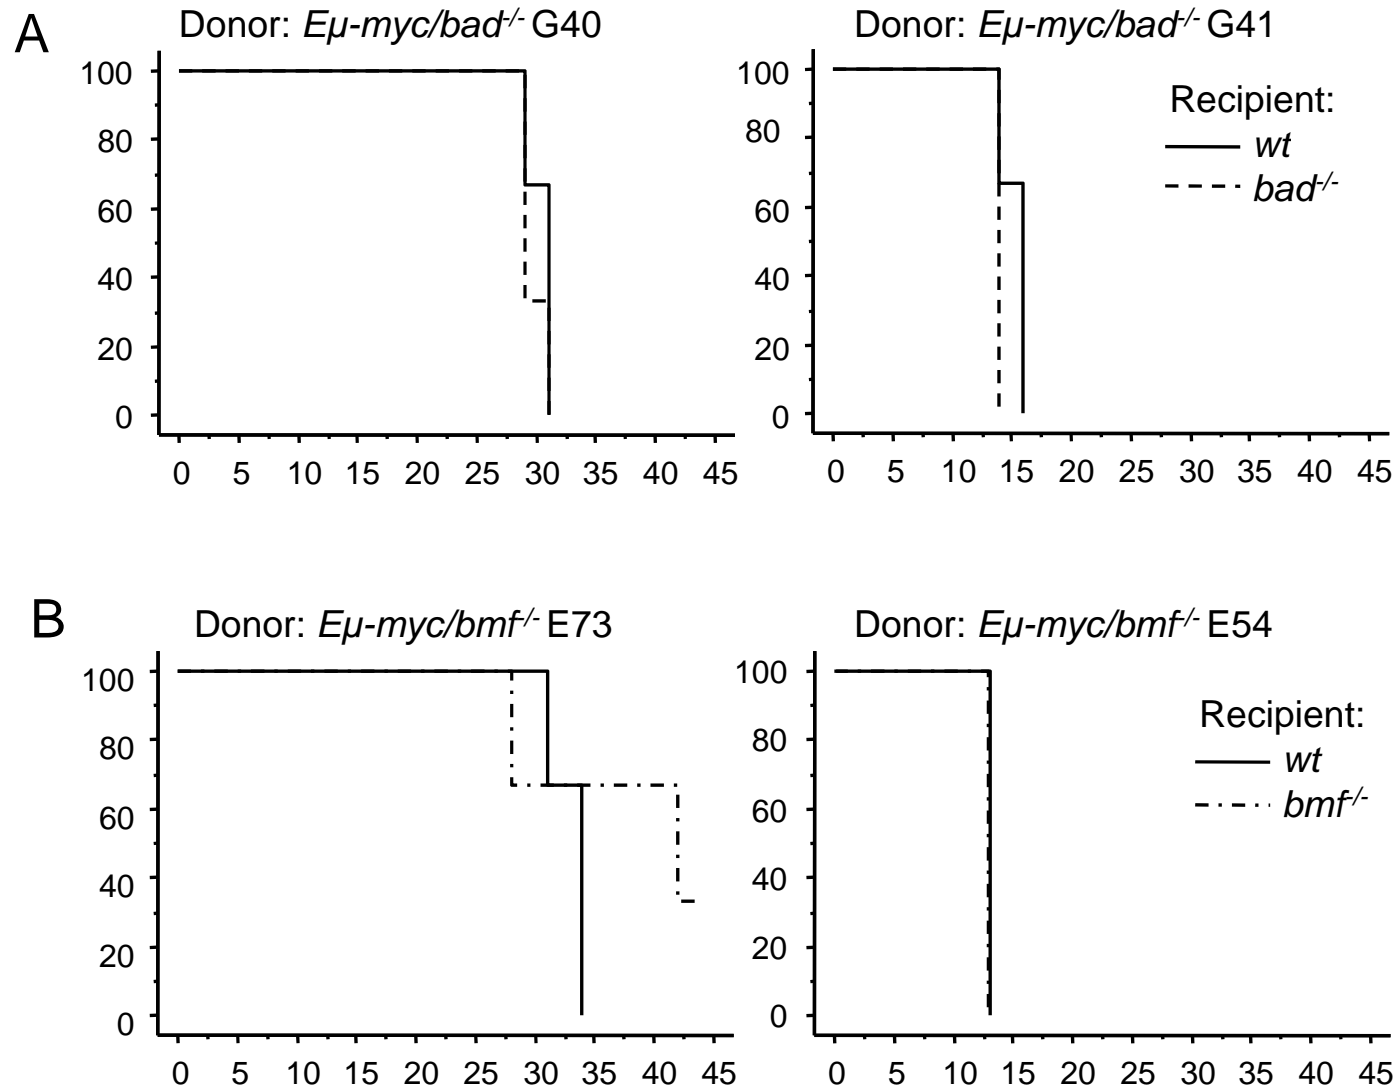

Figure S2

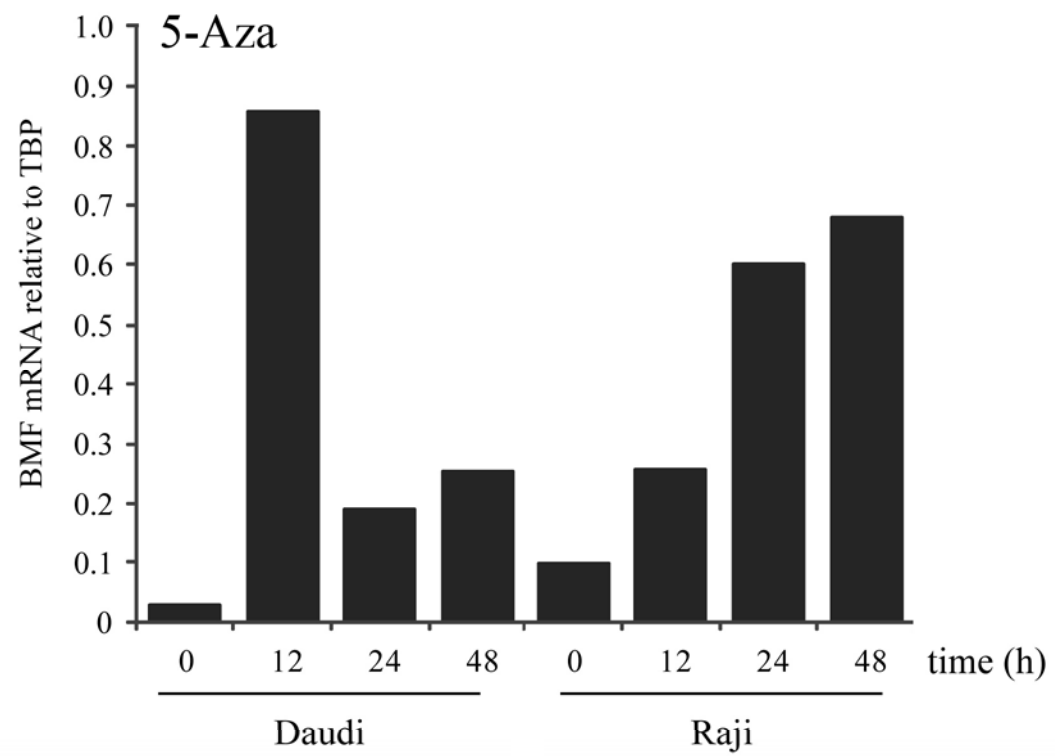

Figure S3

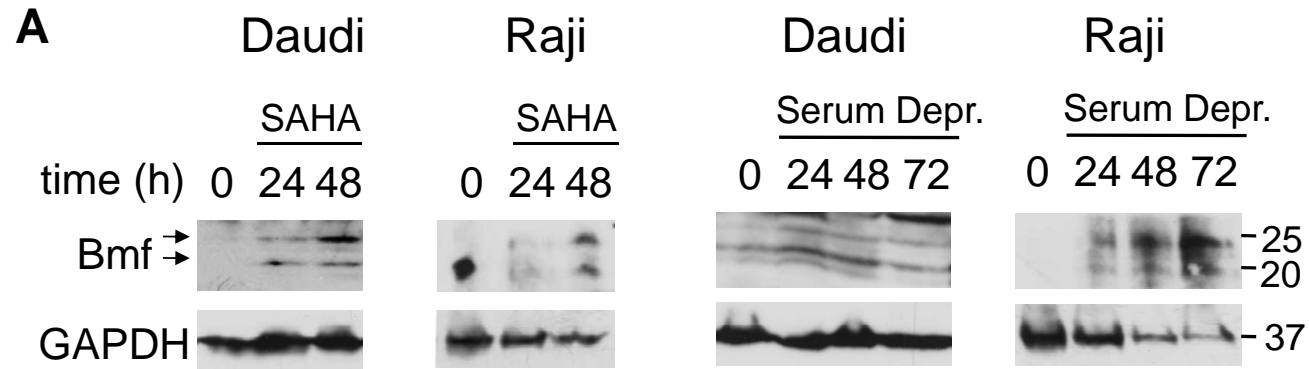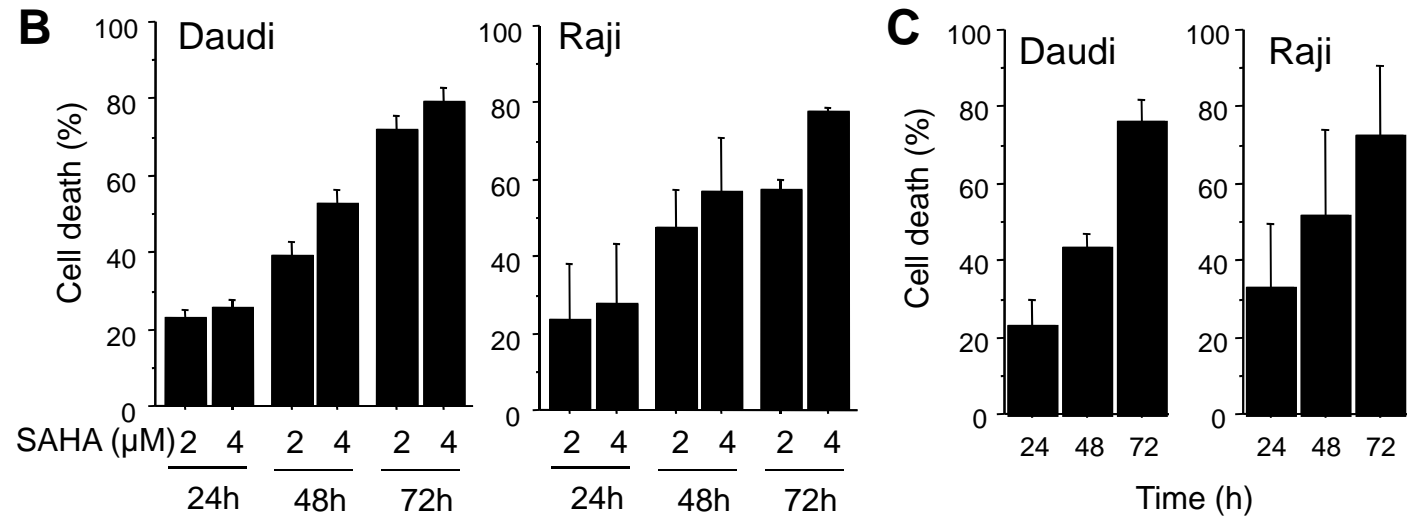

Supplement: NIHMS31344-supplement-01.pdf [file NIHMS31344-supplement-01.pdf]
